# Supplementary material
Source: publisher figshare collection journal article supplement (https://karger.figshare.com/ndownloader/files/27948786)
Supplement: Supplementary file 1 [file 27948786]

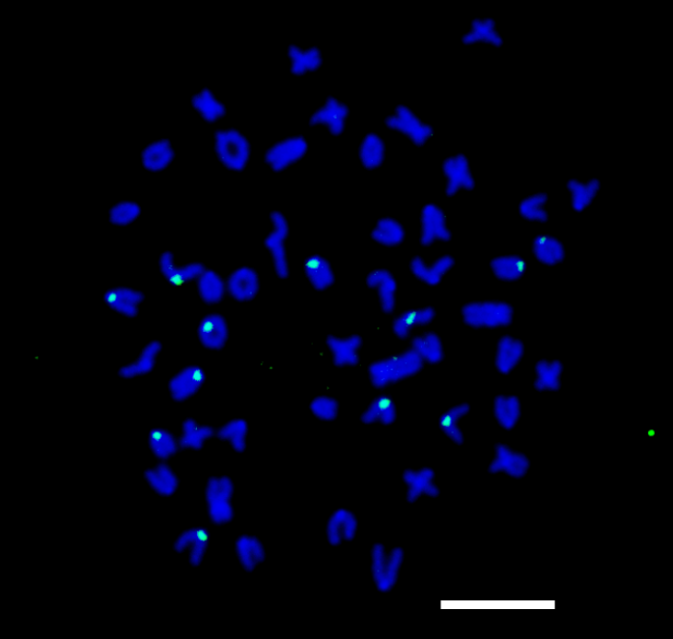

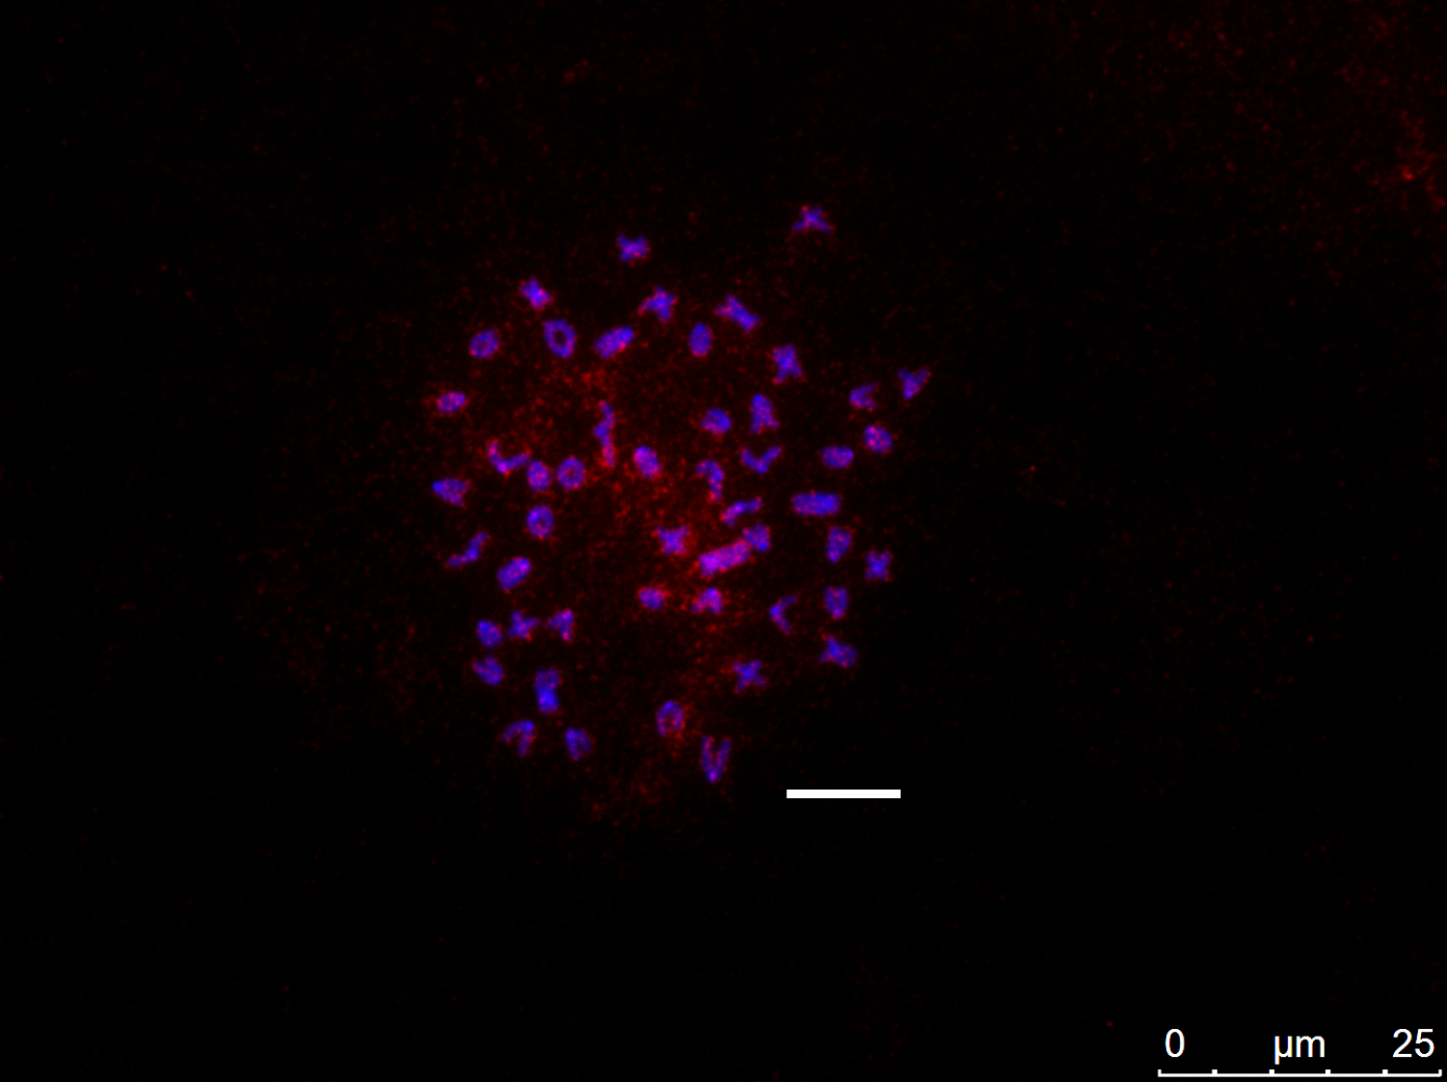


(b)

(a)

**Supplementary Fig. S4.** Two-color FISH with ManDra-A and ManDra-A 5 repeat probes in somatic cells of inter-group hybrids between wild type dojo loach groups A and B. Representative metaphase in somatic cells from inter-group hybrids between wild type dojo loach groups A and B after two-color FISH with ManDra-A signals (a) and ManDra-A 5 repeat signals (b). ManDra-A 5 repeat probe was labeled with biotin-16-dUTP and detected by streptavidin Alexa Fluor 488 conjugate (green). ManDra-A probe was labeled with digoxigenin-11-dUTP and detected by anti-digoxigenin-rhodamine, Fab fragments (red). All chromosomes were counterstained with DAPI (blue). Scale bars denote 10 μm.
